1 **Title**

2 Enemy release mitigates inbreeding depression in native and invasive *Silene latifolia*  
3 populations: experimental insight into the role of inbreeding × environment interactions in  
4 invasion success

5 **Running title:**

6 I×E interactions in a plant invader

7 **Type of article**

8 Research article

9 **Authors**

10 Karin Schrieber<sup>1,2</sup>, Sabrina Wolf<sup>2</sup>, Catherina Wypior<sup>2</sup>, Diana Höhlig<sup>2</sup>, Stephen R. Keller<sup>3</sup>,  
11 Isabell Hensen<sup>2,4</sup>, Susanne Lachmuth<sup>2,4</sup>

12 <sup>1</sup>Bielefeld University, Faculty of Biology, Department of Chemical Ecology, 33615 Bielefeld,  
13 Germany

14 <sup>2</sup>Martin-Luther-University Halle-Wittenberg, Institute of Biology, Geobotany & Botanical  
15 Garden, 06108 Halle (Saale), Germany

16 <sup>3</sup>University of Vermont, Department of Plant Biology, Burlington, VT 05405, U.S.A.

17 <sup>4</sup>German Centre for Integrative Biodiversity Research (iDiv) Halle-Jena-Leipzig, 04103  
18 Leipzig, Germany

19 **Corresponding author**

20 Karin Schrieber

21 Bielefeld University, Faculty of Biology, Department of Chemical Ecology

22 Universitätsstraße 25

23 D-33615 Bielefeld

24 GERMANY

25 Phone: +49 (0) 521 106 67317

26 E-mail: [karin.schrieber@uni-bielefeld.de](mailto:karin.schrieber@uni-bielefeld.de)

27 **No. of**

28 Words (total): 8736

29 Words (main body): 5138

30 Figures: 4

31 Tables: 1

32 References: 76

33 Supporting information: 2

34 **Provision of data**

35 All datasets that support this article will be deposited in Dryad in case the article should be  
36 editorially accepted for publication.

37 **Abstract**

38 Inbreeding and enemy infestation are common in plants and can synergistically reduce their  
39 performance. This inbreeding  $\times$  environment (I $\times$ E) interaction may be of particular  
40 importance for the success of plant invasions if introduced populations experience a release  
41 from attack by natural enemies relative to their native conspecifics. Using native and invasive  
42 plant populations, we investigate whether inbreeding affects infestation damage, whether  
43 inbreeding depression in performance is mitigated by enemy release and whether genetic  
44 differentiation among native and invasive plants modifies these I $\times$ E interactions. We used the  
45 plant invader *Silene latifolia* and its natural enemies as a study system. We performed two  
46 generations of experimental out- and inbreeding within eight native (European) and eight  
47 invasive (North American) *S. latifolia* populations under controlled conditions using field-  
48 collected seeds. Subsequently, we exposed the offspring to an enemy exclusion and  
49 inclusion treatment in a common garden in the species' native range to assess the interactive  
50 effects of population origin (range), breeding treatment and enemy treatment on infestation  
51 damage as well as plant performance. Inbreeding increased flower and leaf infestation  
52 damage in plants from both ranges, but had opposing effects on fruit damage in native  
53 *versus* invasive plants. Both inbreeding and enemy infestation had negative effects on plant  
54 performance, whereby inbreeding depression in fruit number was higher in enemy inclusions  
55 than exclusions in plants from both ranges. Moreover, the magnitude of inbreeding  
56 depression in fruit number was lower in invasive than native populations. Our results support  
57 that inbreeding increases enemy susceptibility of *S. latifolia*, which magnifies inbreeding  
58 depression in the presence of enemies. Enemy release in the invaded habitat may thus  
59 increase the persistence of inbred founder populations and thereby contribute to successful  
60 invasion. Moreover, our findings emphasize that genetic differentiation among native and  
61 invasive plants can shape the magnitude and even the direction of inbreeding effects.

62 **Keywords**

63 biological invasion, genetic differentiation, genetic paradox, herbivory, purging, white

64 campion

65 **Introduction**

66 Understanding the forces that promote or prevent species range expansions remains a  
67 challenging goal in ecology (Barrett, 2015). During invasion of a new range, populations can  
68 be simultaneously exposed to increased inbreeding following founder effects (Schrieber &  
69 Lachmuth, 2017) and to substantial alterations in the biotic and abiotic environment (Catford,  
70 Jansson, & Nilsson, 2009). Inbreeding and environmental change are known to interact in  
71 affecting individual fitness (Fox & Reed, 2011), population growth (Reed, Briscoe, &  
72 Frankham, 2002) and colonization abilities (Hufbauer, Rutschmann, Serrate, Vermeil de  
73 Conchard, & Facon, 2013). Such inbreeding  $\times$  environment (I $\times$ E) interactions are  
74 increasingly perceived as potential determinants of species ranges and their dynamics under  
75 global change (Colautti, Alexander, Dlugosch, Keller, & Sultan, 2017; Leimu, Vergeer,  
76 Angeloni, & Ouborg, 2010; Reed, Fox, Enders, & Kristensen, 2012; Schrieber & Lachmuth,  
77 2017). Nevertheless, empirical studies on the environmental dependency of inbreeding  
78 effects in the context of invasions are scarce (Murren & Dudash, 2012; Rosche et al., 2017),  
79 despite their potential relevance for the prediction and management of invasive species.

80 Invaders can preserve high levels of genetic diversity and sufficient outcrossing rates  
81 during their expansion due to e.g. mass introductions and genetic admixture (Hufbauer,  
82 2008; Rius & Darling, 2014). However, numerous invasions were evidently accompanied by  
83 repeated population bottlenecks during initial introduction and/or colonization at the leading  
84 edge of expansion, which resulted in successive genetic depletion and severe inbreeding in  
85 phases most crucial for invasion success (reviewed in Schrieber & Lachmuth, 2017).  
86 Inbreeding can reduce fitness in the offspring generation (Angeloni, Ouborg, & Leimu, 2011).  
87 Such inbreeding depression arises from an increase in genome-wide homozygosity, which  
88 enhances the phenotypic expression of deleterious recessive mutations (dominance) and  
89 reduces the expression of heterozygote advantage (over-dominance) (Charlesworth & Willis,  
90 2009). Fitness reductions following inbreeding compromise the establishment and growth of  
91 colonizing populations (Hufbauer et al., 2013) and are thus assumed to hamper invasions.

92 The environmental dependency of inbreeding depression provides a hitherto  
93 underappreciated explanation for invasion success in the face of increased inbreeding rates.  
94 Abiotic and biotic stressors induce changes in gene expression, protein and metabolite  
95 synthesis, which maintain physiological homeostasis and, consequently, fitness under  
96 unfavorable environmental conditions (Bundy, Davey, & Viant, 2008). Inbreeding can  
97 compromise such stress responses *via* dominance and over-dominance effects, which  
98 increases the magnitude of inbreeding depression in stressful environments (Fox & Reed,  
99 2011; Kristensen, Pedersen, Vermeulen, & Loeschcke, 2010) while inbreeding depression  
100 remains low to absent in benign environments (Enders & Nunney, 2016; Rosche et al.,  
101 2017). Plant invasions are often accompanied by a release from environmental stressors  
102 such as resource limitation (Blumenthal, 2006), competition (Mitchell et al., 2006) and natural  
103 enemies (Keane & Crawley, 2002). Both inbreeding and stress release occur particularly  
104 during the early stages of invasion and towards the leading edge of expansion (Dietz &  
105 Edwards, 2006; Mitchell et al., 2006). As a consequence, inbreeding depression may be  
106 mitigated in small founder populations that experience a stress release in the non-native  
107 range, thus fostering invasion success (Schrieber & Lachmuth, 2017).

108 Natural enemies are especially important to IxE interactions during invasions, since they  
109 have the potential to regulate long-term patterns of host plant abundance, population  
110 dynamics and distribution (Maron & Crone, 2006). Moreover, there is ample evidence for the  
111 dependency of plant inbreeding depression on rates of infestation by natural enemies (Bello-  
112 Bedoy & Núñez-Farfán, 2011; Carr & Eubanks, 2002; Hayes, Winsor, & Stephenson, 2004).  
113 Studies quantifying inbreeding depression in native and invasive plant populations in the  
114 presence *versus* absence of their natural enemies may thus provide insight into the role of  
115 IxE interactions in invasion success. Such studies can also yield information on how  
116 phenotypic differentiation among host populations impacts the outcome of IxE interactions,  
117 which may help to explain reported inconsistency in their effects on plant performance (Fox &  
118 Reed, 2011; Sandner & Matthies, 2016; 2017). During invasions, plant species often evolve  
119 differences in performance and defense traits (Orians & Ward, 2010; Whitney & Gabler,

120 2008). This phenotypic divergence can arise either from adaptive responses to changes in  
121 the selective regime, for e.g. climate, competition and natural enemies (Agrawal et al., 2015;  
122 Colautti & Barrett, 2013; Zhang & Jiang, 2006), or from neutral processes such as genetic  
123 drift and founder effects (Keller & Taylor, 2008; Lachmuth, Durka, & Schurr, 2011; Travis et  
124 al., 2007). Both adaptive and non-adaptive genetic differentiation likely also alter the genetic  
125 architecture underlying inbreeding depression and its dependency on the environment, e.g.  
126 through differences in the accumulation and purging of genetic load (Klopfstein, Currat, &  
127 Excoffier, 2006; Schrieber & Lachmuth, 2017).

128 Here, we investigate the combined effects of inbreeding and enemy infestation on the  
129 performance of native and invasive populations of the plant species *Silene latifolia* Poir.  
130 (Caryophyllaceae). The species is native to Eurasia and has been introduced to North  
131 America in the early 19th century. During its invasion of North America, *S. latifolia*  
132 experienced events conducive to the expression of I×E-interactions: introduced plants  
133 escaped their natural enemies (Wolfe, 2002) and experienced severe population bottlenecks  
134 (Keller, Gilbert, Fields, & Taylor, 2012; Taylor & Keller, 2007) as well as high inbreeding  
135 levels in founder populations (Fields & Taylor, 2014; Richards, 2000). Moreover, invasive  
136 populations evolved differences in enemy susceptibility and performance (Blair & Wolfe,  
137 2004; Wolfe, Elzinga & Biere, 2004; Keller, Sowell, Neimann, Wolfe & Taylor 2009; Schrieber  
138 et al. 2017) making *S. latifolia* ideally suited for examining the impact of genetic  
139 differentiation on the outcomes of I×E interactions. We conducted experimental inbreeding  
140 and outbreeding within native and invasive *S. latifolia* populations, exposed the offspring to  
141 the absence and presence of natural enemies, and measured traits related to growth,  
142 reproduction and infestation damage to address the following predictions: i) Inbred plants  
143 incur higher infestation damage than outbreds. ii) Plant growth and reproduction are lower in  
144 inbreds than outbreds (inbreeding depression) and in the presence than absence of natural  
145 enemies (stress). iii) The magnitude of inbreeding effects on growth and reproduction is  
146 higher in the presence than in the absence of natural enemies (I×E interaction). iv) The

147 aforementioned individual and combined effects of inbreeding and enemy infestation are  
148 modified by the distinct evolutionary histories of native and invasive populations.

## 149 **Materials and Methods**

### 150 Study system

151 *Silene latifolia* is a short-lived perennial herb mainly distributed across ruderal habitats. The  
152 plant is dioecious and produces sexually dimorphic flowers pollinated by insects. Females  
153 develop large numbers of capsules containing several hundred seeds, which lack a specific  
154 dispersal syndrome and are thus mainly dispersed passively and by human activities. Limited  
155 seed dispersal and restricted pollen transfer among neighboring plants can lead to restricted  
156 gene flow and the formation of kin-structured patches within populations (McCauley, 1997;  
157 1994). These characteristics have been shown to result in high levels of biparental  
158 inbreeding in small, isolated or recently founded *S. latifolia* populations (Fields & Taylor,  
159 2014; Richards, 2000).

160 In its native range (Eurasia), *S. latifolia* is attacked by three specialist enemies: *Hadena*  
161 *bicruris* Hufn. (Noctuidae) - a noctuid moth that is a specialist pollinator (adult) and a seed  
162 predator (larva) at the same time; *Microbotryum violaceum* (Pers.) G. Deml & Oberw.  
163 (Microbotryaceae) - a systemic sterilizing fungus; and *Brachycaudus lychnidis* L. (Aphididae)  
164 - an aphid that causes flowers to abort due to phloem-feeding (Wolfe, 2002). Moreover,  
165 native populations are attacked by various leaf- and flower feeding generalist herbivores,  
166 including slugs (mainly *Arion lusitanicus* Mabille (Arionidae)), beetles, thrips, caterpillars  
167 (often *Mamestra brassicae* L. (Noctuidae)) and leaf miners as well as by several generalist  
168 rust and mildew fungi (Schrieber et al. 2017). In the invaded range (North America), *H.*  
169 *bicruris* is completely absent (Wolfe, 2002), the occurrence of *M. violaceum* is locally  
170 restricted to a small region in Virginia (Antonovics, Hood, Thrall, Abrams, & Duthie, 2003),  
171 and the abundance of aphids as well as leaf and flower feeding generalists is very low  
172 relative to the native range (Wolfe, 2002). Invasive *S. latifolia* populations exhibit higher



173 growth and reproduction as well as higher susceptibility to enemy infestation relative to  
174 native populations, which can be attributed to both adaptive and non-adaptive evolutionary  
175 processes (Blair & Wolfe 2004; Wolfe et al. 2004; Keller et al. 2009; Schrieber et al. 2017). A  
176 trade-off between growth/reproduction and enemy susceptibility was not detected in this  
177 species (Schrieber et al. 2017).

#### 178 Field sampling and experimental setup

179 We collected open-pollinated seeds from eight native and eight invasive *S. latifolia*  
180 populations (Supporting Information Fig. S1, Table S2). Sampling in the native range  
181 comprised the geographic source regions of introduction (broadly, eastern and western  
182 Europe), while sampling in the invasive range comprised the geographic regions of initial  
183 introduction and early expansion (eastern North America), as identified by Taylor & Keller,  
184 (2007) and Keller et al. (2012). Within each population, we sampled one capsule (maternal  
185 family) from each of five different female plants that were equally distributed over the  
186 population area and spatially separated from each other as far as possible. Using these  
187 maternal families, we conducted two generations of experimental inbreeding and outbreeding  
188 within all native and invasive populations under controlled greenhouse conditions. The  
189 offspring were exposed to the absence and presence of natural enemies in a common  
190 garden in the species' native range. Data for the outbred plants from this experiment have  
191 previously been used to investigate adaptive and non-adaptive differentiation in growth,  
192 reproduction and enemy susceptibility between the native and invaded range (Schrieber et  
193 al., 2017).

#### 194 Experimental inbreeding and outbreeding

195 For the P-generation, we germinated ten seeds from each of the five field-collected families  
196 in 0.8 mM Gibberellic acid in a germination chamber (16 h light at 25 °C, 8 h dark at 13 °C).  
197 After six days, the seedlings were planted into pots and transferred to the greenhouse (16 h  
198 light at 25 °C, 8 h dark at 13 °C) where they received weekly fertilization (Kamasol Brilliant

199 Rot, Compo Expert, Münster, GE). After seven weeks, we randomly chose one male and one  
200 female plant per family for crosses. Each female received pollen from a sib male belonging to  
201 the same family (inbreeding), and pollen from a male belonging to a different family within the  
202 same population (outbreeding) at distinct flowers (Fig. 1). The crossing of the P-generation  
203 resulted in 160 population ( $N = 16$ )  $\times$  family ( $N = 5$ )  $\times$  breeding treatment ( $N = 2$ )  
204 combinations (PFBCs). For the second generation, we randomly chose one capsule per PFB  
205 and propagated the F1-plants from its seeds as described for the P-generation. Female  
206 inbred offspring received pollen from an inbred male from the same family, while female  
207 outbred offspring received pollen from an outbred male from a different family with respect to  
208 the relationships created in the first generation (Fig. 1). We lost seven of the 160 PFBCs due  
209 to lack of germination, high mortality, lack of flowering or production of sterile flowers in both  
210 inbred and outbred families during the propagation of the F1-generation. Consequently, we  
211 obtained a total of 153 PFBCs for the F2-generation plants, which were used for the enemy  
212 release experiment.

### 213 Enemy release experiment

214 We exposed native and invasive, inbred and outbred *S. latifolia* plants from the F2-  
215 generation to an enemy exclusion and an enemy inclusion treatment using a fully factorial  
216 experimental approach (16 populations [8 native *versus* 8 invasive]  $\times$  4-5 families  $\times$  2  
217 breeding treatments [inbred *versus* outbred]  $\times$  2 enemy treatments [exclusion *versus*  
218 inclusion]  $\times$  8 replicates = 1,224 plants). In early spring, we germinated eight seeds  
219 originating from one capsule per PFBC and reared the F2-plants for six weeks in a common  
220 garden in Halle (Saale), Germany (51.489 °N 11.959 °E alt: 88 m). After six weeks, we  
221 moved the plants to the UFZ Research Station in Bad Lauchstädt, Germany (51.391°N,  
222 11.878°E, alt: 116 m). The planting area was densely covered by a diverse plant community  
223 of grasses and forbs including a patchy population of *S. latifolia* that was infested by all of the  
224 above-mentioned specialist and generalist enemies. In the common garden, we established  
225 four vegetation-free belts, which comprised four plots respectively ( $\Sigma = 16$  plots) (Fig. 2).

226 Each plot included all native and invasive populations represented by two to three F2  
227 maternal families each with one inbred and one outbred individual. As such, the five families  
228 within each population were split between two plots (plot pair), which together comprised all  
229 of the 153 PFBCs. Each plot pair was replicated an additional seven times. While  
230 populations and families were planted randomly within the plots, the range and breeding  
231 treatments were uniformly distributed according to a fixed scheme (Fig. 2) in order to reduce  
232 confounding plot edge effects. Plots within pairs and plot pair repetitions were randomly  
233 distributed across the experimental area. We experimentally excluded natural enemies in  
234 eight of the plots (enemy exclusions) over a period of three months (Fig. 2). For this purpose,  
235 we used slug fences coated with a gastropod deterrent (Schneckenabwehrpaste, Irka,  
236 Mietingen, GE), as well as a molluscicide (Limex, Celaflo), systemic insecticides (alternating  
237 between Calypso and Confidor, Bayer, Leverkusen, GE) and a systemic universal fungicide  
238 (Baycor M, Bayer, Leverkusen, GE), which were applied in a two-week cycle in accordance  
239 with the manufacturers instructions. The remaining eight plots (enemy inclusions) were not  
240 treated with pesticides and therefore extensively colonized by specialist and generalist  
241 herbivores two weeks after the experiment was set up. The removal of vegetation however  
242 deterred *A. lusitanicus* from entering the inclusion plots, so we equipped them with slug  
243 fences whose impassable sides were turned towards the plot interior and introduced 15 *A.*  
244 *lusitanicus* individuals to each plot. We adjusted the number of slugs within each inclusion  
245 plot to 15 three times a week. The infection with specialist and generalist fungi remained low  
246 in all inclusion plots for the entire experimental period. All plots were weeded weekly and  
247 watered when necessary during the experiment.

248 After three months of enemy treatment application, we collected data on morphological  
249 defense and infestation damage for each plant in the enemy inclusion plots. We collected  
250 leaves at similar stages of development to determine trichome density in a 5 × 5 mm area  
251 away from the main vein and at the broadest section of the leaf. In addition, we determined  
252 the proportion of flowers (including buds) damaged by tissue removal (generalist herbivores)  
253 or phloem sucking (*B. lychnidis*), the proportion of fruits predated by *H. bicruris* larvae and

254 the proportion of fully grown leaves infested by generalist herbivores (mainly *A. lusitanicus*  
255 and *M. brassicae*). Data on infection rates with the specialist fungus *M. violaceum* and other  
256 generalist fungi were not included in the data analysis, as the abundance of these pathogens  
257 was generally very low. Furthermore, we collected data on plant growth and reproduction in  
258 both enemy inclusion and exclusion plots. We measured the corolla diameter of the biggest  
259 flower and counted the number of flowers (including buds) for all male and female plants.  
260 Moreover, we determined the number of fruits for all female plants. Seed number, weight and  
261 germination were not assessed, since seeds resulted from uncontrolled crossings among  
262 plants from all populations, both ranges and both breeding treatments. Finally, we  
263 determined the dry aboveground biomass (48 h, 80 °C) for all plant individuals.

#### 264 Statistical analysis

265 All statistical analyses were conducted with R version 3.2.3 (R Development Core Team,  
266 2015). We used linear mixed-effects models (LMMs) for response variables with Gaussian  
267 error distribution and generalized linear mixed-effects models (GLMMs) for response variables  
268 with Poisson or binomial errors (R-package: lme4; Bates, Maechler, Bolker, & Walker, 2014).

269 The models for the responses trichome density (LMM, Gaussian, square-root transformed),  
270 leaf damage (GLMM, binomial), flower damage (GLMM, binomial) and fruit damage (GLMM,  
271 binomial) (all assessed in enemy inclusion plots only) comprised the fixed effects of range and  
272 breeding treatment as well as an interaction among both factors. The models for the  
273 responses biomass (LMM, Gaussian, square-root transformed), corolla size (LMM, Gaussian),  
274 number of flowers (GLMM, Poisson) and number of fruits (GLMM, Poisson) (all assessed in  
275 both enemy exclusions and inclusions) comprised the fixed effects of range, breeding  
276 treatment and enemy treatment as well as all possible interactions among these factors. All of  
277 the described models additionally involved the latitudinal coordinates of the population of origin  
278 (centered and scaled) and plant sex (except for fruit damage and number of fruits) as  
279 covariates. Moreover, all models included the random effects of plot, population and paternal

280 plant in P-generation nested within population as well as maternal plant in P-generation nested  
281 within population.

282 All models were fitted with a maximum likelihood approach. GLMMs were then tested for  
283 under- and overdispersion (R-package: blemco, Korner-Nievergelt et al. 2015). The GLMMs  
284 for leaf damage and number of flowers were overdispersed and consequently complemented  
285 by an observational level random factor in order to improve the model fit and avoid biased  
286 parameter estimates (Harrison, 2014; 2015). After assuring that (G)LMMs exhibit variance  
287 homogeneity and normal distribution of residuals by means of visual inspection (Zuur, Ieno,  
288 Walker, Savilliev, & Smith, 2009), we applied step-wise backward model selection to obtain the  
289 minimal adequate models. Here, we removed fixed effect terms with  $p > 0.05$  based on  
290 likelihood ratio tests (Venables & Ripley, 2000). For illustration of the interactive effects of  
291 range, breeding treatment and enemy treatment on plant performance responses, we  
292 extracted least square means with standard errors from the respective full mixed effects  
293 models (Lenth, 2016). In contrast to raw data means and their standard errors, these model  
294 estimates account for the specific error distribution of the responses, for the effects of  
295 covariates as well as for random effects.

## 296 **Results**

### 297 Interactive effects of range and breeding treatment on morphological plant defense and 298 infestation damage

299 The density of leaf trichomes was not significantly influenced by range, breeding treatment, the  
300 interaction range  $\times$  breeding treatment or one of the covariates (Table 1, Fig. 3a). The  
301 proportion of damaged leaves was significantly related to range and breeding treatment (Table  
302 1). Invasive plants experienced more leaf damage compared to native plants ( $p < 0.05$ ,  $\chi^2 =$   
303 5.4) and inbred plants from both distribution ranges suffered stronger from leaf infestation  
304 compared to outbreds ( $p < 0.001$ ,  $\chi^2 = 41.7$ ) (Fig. 3b). The proportion of damaged flowers  
305 depended significantly on range, breeding treatment and the covariate sex (Table 1). Flower

306 infestation was higher for invasive than native ( $p < 0.01$ ,  $\chi^2 = 6.8$ ), inbred than outbred ( $p <$   
307  $0.001$ ,  $\chi^2 = 41.0$ ) (Fig. 3c) and male than female plants ( $p < 0.05$ ,  $\chi^2 = 5.2$ ). The proportion of  
308 damaged fruits was significantly influenced by the interaction range  $\times$  breeding treatment ( $p <$   
309  $0.05$ ,  $\chi^2 = 4.1$ ). Here, invasive plants received generally more fruit damage than native plants  
310 and fruit infestation was higher on inbred than outbred native plants but lower on inbred than  
311 outbred invasive plants (Fig. 3d).

312 Interactive effects of range, breeding treatment and enemy treatment on plant growth and  
313 reproduction

314 The aboveground biomass of experimental plants was significantly related to the interaction  
315 range  $\times$  enemy treatment, to breeding treatment and to plant sex (Table 1, Fig. 4a). Plants  
316 exhibited reduced biomass in enemy inclusions relative to exclusions, whereby this effect  
317 was stronger in invasive than native populations ( $p < 0.05$ ,  $\chi^2 = 4.8$ ). Inbred plants produced  
318 significantly less biomass compared to outbred plants ( $p < 0.001$ ,  $\chi^2 = 116.6$ ) and female  
319 plants had higher biomass than males ( $p < 0.001$ ,  $\chi^2 = 44.5$ ). Range, breeding treatment and  
320 enemy treatment had no significant interactive effects on the corolla diameter of *S. latifolia*  
321 plants (Table 1). Instead, corolla size was generally lower for inbred than outbred ( $p < 0.001$ ,  
322  $\chi^2 = 54.5$ ) (Fig. 4b) and female than male plants ( $p < 0.001$ ,  $\chi^2 = 41.4$ ). The number of flowers  
323 per plant individual was distinctively lower for inbred than outbred ( $p < 0.001$ ,  $\chi^2 = 24.5$ ) (Fig.  
324 4c) and female than male plants ( $p < 0.001$ ,  $\chi^2 = 133.5$ ). The number of fruits produced by  
325 female plants depended significantly on the two-way interactions range  $\times$  breeding treatment  
326 and breeding treatment  $\times$  enemy treatment (Table 1, Fig. 4d). Invasive plants produced more  
327 fruits than native plants in both breeding and enemy treatments. Moreover, inbred plants had  
328 less fruits than outbred plants in both enemy treatments and in populations from both  
329 distribution ranges. This inbreeding depression was less intense in invasive than native  
330 populations ( $p < 0.05$ ,  $\chi^2 = 5.9$ ) and stronger in enemy inclusions than exclusions ( $p < 0.05$ ,  
331  $\chi^2 = 4.1$ ).

332 **Discussion**

333 Our study provides support that I×E interactions can contribute to successful plant invasion  
334 and that these interactions are shaped by the evolutionary histories of plant populations. Here,  
335 we discuss a) that inbreeding increases enemy infestation damage, which in turn magnifies  
336 inbreeding depression in *S. latifolia* plants from both distribution ranges; and b) that some of  
337 the inbreeding effects on infestation damage and reproductive traits differ in their magnitude  
338 and even in their direction among native and invasive plants as a result of non- adaptive/  
339 adaptive evolutionary processes.

340

341 **Enemy release mitigates inbreeding depression in native and invasive *S. latifolia* plants**

342 In accordance with our hypothesis, inbred *S. latifolia* plants from both distribution ranges for  
343 the most part incurred higher infestation damage from natural enemies in the common garden  
344 than outbreds (Fig. 3b, c; but see Fig. 3d and discussion in next section). Plants often exhibit  
345 increased susceptibility to enemies following inbreeding (Bello-Bedoy & Núñez-Farfán, 2011;  
346 Campbell, Thaler, & Kessler, 2013; Kariyat, Mena-Alí, et al., 2012), since dominance and over-  
347 dominance can either affect gene-loci that contribute directly to plant resistance against  
348 enemies (Kariyat, Mena-Alí, et al., 2012) or induce general stress responses that trade-off  
349 against responses to environmental stressors such as natural enemies (Kristensen et al.,  
350 2010). Using the same inbred and outbred families of native and invasive *S. latifolia*  
351 populations investigated in the present study, Schrieber, Kröner, Schweiger and Müller (in  
352 press) demonstrated that inbreeding significantly compromises the plants' chemical responses  
353 to insect herbivory. That study also indicated that higher infestation damage on inbred *S.*  
354 *latifolia* individuals can result from compensatory feeding triggered by poor host plant quality.  
355 Previous studies on other plant species also demonstrated that inbreeding reduces the  
356 concentration of chemicals mediating direct (Campbell et al., 2013) and indirect (Kariyat,  
357 Mauck, De Moraes, Stephenson, & Mescher, 2012) plant defense as well as host plant quality  
358 (Leimu, Kloss, & Fischer, 2008).

359 In line with our expectation, both inbreeding and enemy infestation reduced the growth and  
360 reproduction of *S. latifolia* in native and invasive populations, whereby inbreeding had a  
361 pronounced impact while the effect of enemy infestation was more moderate (Fig. 4). As  
362 hypothesized, the effects of breeding and enemy treatment were not purely additive. While the  
363 magnitude of inbreeding depression was independent of the enemy treatment for biomass,  
364 corolla diameter and flower number (Fig 4a, b, c), it was significantly lower in enemy  
365 exclusions than inclusions for fruit number in both distribution ranges (Fig. 4d). The  
366 observation that inbreeding depression in traits closely linked to individual fitness increases  
367 under stress, while morphological traits that are only indirectly related to reproductive success  
368 (i.e., biomass, corolla diameter) are not significantly affected by IxE interactions, has also  
369 been made in previous studies (Bello-Bedoy & Núñez-Farfán, 2011; Schou, Loeschcke, &  
370 Kristensen, 2015). This difference can indeed be expected, since the investment in  
371 reproduction by the end of a growing season is highly dependent on an individual's cumulative  
372 performance and thus cumulative (interactive) effects of inbreeding and herbivory on  
373 performance throughout the season (Orr, 2009). Moreover, in contrast to flower number, fruit  
374 number in experimental *S. latifolia* plants was affected by all three types of infestation damage  
375 (leaf, flower and fruit infestation) and thus pressure by natural enemies was highest for this  
376 fitness related trait. Our finding indicates that the enemy release in the invaded habitat may  
377 mitigate detrimental inbreeding effects on reproductive output in colonizing *S. latifolia*  
378 populations. The IxE interactions detected for native populations under experimental  
379 conditions may be representative of a scenario of initial population founding and establishment  
380 during early invasion phases, in which plants are naive to the novel environment. IxE  
381 interactions in the investigated invasive plants, in turn, may represent a scenario of population  
382 founding at the leading edge, where populations have already undergone evolutionary  
383 responses to the environment of the introduced range.

384 Our findings of lower inbreeding depression in benign *versus* harsh habitats in a plant  
385 invader go along with those of two previous studies on *Mimulus guttatus* DC. (Murren &  
386 Dudash, 2012) and *Centaurea stoebe* L. (Rosche et al., 2017), which together emphasize the



387 relevance of I×E interactions for species expansions and the need for further research under  
388 more realistic field conditions. The transplantation of inbred and outbred plants to native as  
389 well as invasive field habitats is necessary to assess the net effect of multiple stressors  
390 occurring in both environments on the magnitude of inbreeding depression. Ideally, such  
391 approaches should involve the quantification of demographic rates in order to parameterize  
392 models that estimate population growth and/or spread rates (Normand, Zimmermann, Schurr,  
393 & Lischke, 2014; Schultz, Eckberg, Berg, Louda, & Miller, 2017). Studies of this kind could  
394 further elaborate whether and to what extent I×E interactions add to several other mechanisms  
395 (e.g., genetic admixture, mass introductions, Estoup et al., 2016; Roman & Darling, 2007) that  
396 can explain the successful spread of invaders in the face of genetic bottlenecks, i.e. the so-  
397 called genetic paradox of biological invasions (Schrieber & Lachmuth, 2017).

398 Evolutionary history modifies the magnitude and direction of inbreeding effects on plant  
399 interactions with natural enemies

400 We detected evolutionary differentiation in plant susceptibility to enemy infestation (Fig. 3b, c,  
401 d) and plant performance among native and invasive populations of *S. latifolia* (Fig. 4d). This  
402 observation has also been made in previous studies of *S. latifolia* (Blair & Wolfe, 2004; Keller  
403 et al., 2009; Schrieber et al., 2017; Wolfe et al., 2004), where it has been discussed in detail  
404 with regard to the driving evolutionary forces (i.e. adaptive *versus* non-adaptive evolution,  
405 potential selective agents, trade-offs).

406 However, new to our study is the finding that the magnitude and even the direction of  
407 inbreeding effects on some metrics of infestation damage and reproductive traits differed  
408 among native and invasive *S. latifolia* populations. While inbreeding slightly increased fruit  
409 damage in native plants, the proportion of fruits infested by *H. bicurris* was considerably lower  
410 on inbreds than outbreds for invasive plants. At the same time, fruit infestation was generally  
411 higher on invasive plants (Fig. 3d). This finding may be attributed to the combined effects of  
412 genetic differentiation and inbreeding on host plant attractivity. Previous studies elaborated  
413 that higher fruit infestation by *H. bicurris* on invasive *S. latifolia* does not result from higher

414 larva performance, but from increased oviposition rates (Elzinga & Bernasconi, 2009). Adult *H.*  
415 *bicruris* females are attracted to oviposition on *S. latifolia* by a specific floral volatile blend,  
416 whereby invasive plants emit larger total amounts of these volatiles (Dötterl, Jürgens, Wolfe, &  
417 Biere, 2009). Based on studies using other plant species (Delphia, Rohr, Stephenson,  
418 De Moraes, & Mescher, 2009; Ferrari, Stephenson, Mescher, & Moraes, 2006), one possibility  
419 is that inbreeding reduced the total floral volatile production in *S. latifolia* either directly by  
420 impairing the synthesis of volatiles or by reducing flower number (Fig 4c, enemy exclusions),  
421 which may have made inbred plants less attractive hosts for oviposition. This potential  
422 inbreeding effect on host plant attractivity may have been only apparent in invasive  
423 populations due to a specific volatile concentration threshold for the plant's apparency to *H.*  
424 *bicruris*. Further studies on the inbreeding effects on the composition and concentration of  
425 floral volatiles are necessary to test this assumption.

426 In addition, we found that inbreeding depression for fruit number was less pronounced in  
427 introduced relative to native populations (Fig. 4d). Differences in the magnitude of  
428 experimental inbreeding depression among populations have often been related to the history  
429 of inbreeding within natural source populations (Angeloni et al., 2011). Inbreeding depression  
430 is assumed to be lower in populations that have experienced high levels of natural inbreeding,  
431 as a result of exposing deleterious recessive mutations to negative selection. As a  
432 consequence, the frequency of these mutations within populations can rapidly decrease (i.e.  
433 purging of genetic load; Crnokrak & Barrett, 2002), which reduces dominance effects resulting  
434 from experimental inbreeding. Invasive populations of *S. latifolia* indeed experienced  
435 increased inbreeding levels during the colonization of North America, as evinced by inter- and  
436 intra population crossing experiments (Richards, 2000), enhanced genetic structure in recently  
437 founded compared to longer established populations (McCauley, Raveill, & Antonovics, 1995)  
438 and the occurrence of severe demographic bottlenecks during initial founding (Keller et al.,  
439 2012; Taylor & Keller, 2007). Since reproductive traits such as fruit production are crucial for  
440 invasion success (Burns, Ashman, Steets, Harmon-Threatt, & Knight, 2011; Phillips, Brown, &

441 Shine, 2010), strong negative selection against genetic load may have induced highly efficient  
442 purging under demographic conditions of colonization and invasion.

#### 443 **Conclusions**

444 Our findings indicate that stress release during invasions may mitigate inbreeding depression  
445 in founding populations, which potentially contributes to the successful establishment and  
446 expansion of introduced populations. On the other hand, I×E interactions may hamper the  
447 colonization of novel habitats that exhibit increased stress levels relative to a species' native  
448 source habitat (Hufbauer et al., 2013). Furthermore, our data illustrate that the inbreeding  
449 effects on an organism's interaction with its environment are likely shaped by the evolutionary  
450 histories of populations. As the native and invaded range of a species can differ systematically  
451 in the stress regimes they experience, ongoing invasions provide ideal study systems for  
452 investigating the effects of evolutionary differentiation on the outcomes of I×E interactions, and  
453 how, in turn, the different outcomes may alter the evolutionary trajectories of invasive  
454 populations. Studies addressing these issues hold implications that extend far beyond invasive  
455 model species. I×E interactions may potentially shape the dynamics of natural populations  
456 whenever they are simultaneously exposed to habitat change and increased inbreeding rates  
457 following founder effects or population size reductions. These conditions occur not only during  
458 species range expansions, but also during range shifts and retractions in the course of global  
459 change (Colautti et al., 2017).

#### 460 **Acknowledgements**

461 This study was financially supported by the German Academic Exchange Service (DAAD,  
462 315-kp-hus) and the graduate program for the promotion of network building among female  
463 Ph.D. students from the Martin Luther University of Halle Wittenberg. We thank Tabea and  
464 Chris Steinbeißer-Fitz for accommodation during the fieldwork in the USA. We are grateful

465 for the technical assistance provided by Roman Adler, Eva Bremer, Frédéric Couderc,  
466 Sandrine Maurice, Ines Merbach, Tina Klemme, Philipp Kuttig, Birgit Müller, Antonella Vinei,  
467 Christine Voigt and Eckhard Winter in field, lab and greenhouse. We also thank Helge  
468 Bruelheide and the Helmholtz Centre for Environmental Research (UfZ) Halle for providing  
469 space and material for the experiment.

#### 470 **Author contributions**

471 SL and KS conceptualized the research and designed the study. KS conducted the field  
472 sampling, the experimental crossings and the enemy release experiment and collected the  
473 data with assistance of CW, DH and SW. KS analyzed the data. KS and SL interpreted the  
474 data. KS wrote the first version of the manuscript and SL, SK and IH contributed to the final  
475 version.

#### 476 **References**

- 477 Agrawal, A. A., Hastings, A. P., Bradburd, G. S., Woods, E. C., Züst, T., Harvey, J. A., &  
478 Bukovinszky, T. (2015). Evolution of plant growth and defense in a continental  
479 introduction. *The American Naturalist*, 186(1), E1–E15.  
480 doi:<http://doi.org/10.1086/681622>
- 481 Angeloni, F., Ouborg, N. J., & Leimu, R. (2011). Meta-analysis on the association of  
482 population size and life history with inbreeding depression in plants. *Biological  
483 Conservation*, 144(1), 35–43. doi:10.1016/j.biocon.2010.08.016
- 484 Antonovics, J., Hood, M. E., Thrall, P. H., Abrams, J. Y., & Duthie, G. M. (2003). Herbarium  
485 studies on the distribution of anther-smut fungus (*Microbotryum violaceum*) and  
486 *Silene* species (Caryophyllaceae) in the eastern United States. *American Journal of  
487 Botany*, 90(10), 1522–1531. doi:10.3732/ajb.90.10.1522

- 488 Barrett, S. C. H. (2015). Foundations of invasion genetics: the Baker and Stebbins legacy.  
489 *Molecular Ecology*, 24(9), 1927–1941. doi:10.1111/mec.13014
- 490 Bates, D., Maechler, M., Bolker, B., & Walker, S. (2014). lme4: Linear mixed-effects models  
491 using Eigen and S4. R package version 1.1-7. Retrieved from URL: [http://CRAN.R-](http://CRAN.R-project.org/package=lme4)  
492 [project.org/package=lme4](http://CRAN.R-project.org/package=lme4) (2014).
- 493 Bello-Bedoy, R., & Núñez-Farfán, J. (2011). The effect of inbreeding on defence against  
494 multiple enemies in *Datura stramonium*. *Journal of Evolutionary Biology*, 24(3), 518–  
495 530. doi:10.1111/j.1420-9101.2010.02185.x
- 496 Blair, A. C., & Wolfe, L. M. (2004). The evolution of an invasive plant: an experimental study  
497 with *Silene latifolia*. *Ecology*, 85(11), 3035–3042. doi:10.1890/04-0341
- 498 Blumenthal, D. M. (2006). Interactions between resource availability and enemy release in  
499 plant invasion. *Ecology Letters*, 9(7), 887–895. doi:10.1111/j.1461-  
500 0248.2006.00934.x
- 501 Bundy, J. G., Davey, M. P., & Viant, M. R. (2008). Environmental metabolomics: a critical  
502 review and future perspectives. *Metabolomics*, 5(1), 3–21. doi:10.1007/s11306-008-  
503 0152-0
- 504 Burns, J. H., Ashman, T.-L., Steets, J. A., Harmon-Threatt, A., & Knight, T. M. (2011). A  
505 phylogenetically controlled analysis of the roles of reproductive traits in plant  
506 invasions. *Oecologia*, 166(4), 1009–1017. doi:10.1007/s00442-011-1929-9
- 507 Campbell, S. A., Thaler, J. S., & Kessler, A. (2013). Plant chemistry underlies herbivore-  
508 mediated inbreeding depression in nature. *Ecology Letters*, 16(2), 252–260.  
509 doi:10.1111/ele.12036
- 510 Carr, D. E., & Eubanks, M. D. (2002). Inbreeding alters resistance to insect herbivory and  
511 host plant quality in *Mimulus guttatus* (Scrophulariaceae). *Evolution*, 56(1), 22–30.  
512 doi:10.1554/0014-3820(2002)056[0022:IARTIH]2.0.CO
- 513 Catford, J. A., Jansson, R., & Nilsson, C. (2009). Reducing redundancy in invasion ecology  
514 by integrating hypotheses into a single theoretical framework. *Diversity and*  
515 *Distributions*, 15(1), 22–40. doi:10.1111/j.1472-4642.2008.00521.x

- 516 Charlesworth, D., & Willis, J. H. (2009). The genetics of inbreeding depression. *Nature*  
517 *Reviews Genetics*, 10(11), 783–796. doi:10.1038/nrg2664
- 518 Colautti, R. I., Alexander, J. M., Dlugosch, K. M., Keller, S. R., & Sultan, S. E. (2017).  
519 Invasions and extinctions through the looking glass of evolutionary ecology.  
520 *Philosophical Transaction of the Royal Society B: Biological Sciences*, 372(1712),  
521 20160031. doi:10.1098/rstb.2016.0031
- 522 Colautti, R. I., & Barrett, S. C. H. (2013). Rapid adaptation to climate facilitates range  
523 expansion of an invasive plant. *Science*, 342(6156), 364–366.  
524 doi:10.1126/science.1242121
- 525 Crnokrak, P., & Barrett, S. C. (2002). Perspective: purging the genetic load: a review of the  
526 experimental evidence. *Evolution*, 56(12), 2347–2358. doi:10.1111/j.0014-  
527 3820.2002.tb00160.x
- 528 Delphia, C. M., Rohr, J. R., Stephenson, A. G., De Moraes, C. M., & Mescher, M. C. (2009).  
529 Effects of genetic variation and inbreeding on volatile production in a field population  
530 of horsenettle. *International Journal of Plant Sciences*, 170(1), 12–20.  
531 doi:10.1086/593039
- 532 Dietz, H., & Edwards, P. J. (2006). Recognition that causal processes change during plant  
533 invasion helps explain conflicts in evidence. *Ecology*, 87(6), 1359–1367.  
534 doi:10.1890/0012-9658(2006)87[1359:RTCPD]2.0.CO;2
- 535 Dötterl, S., Jürgens, A., Wolfe, L., & Biere, A. (2009). Disease status and population origin  
536 effects on floral scent: potential consequences for oviposition and fruit predation in a  
537 complex interaction between a plant, fungus, and noctuid moth. *Journal of Chemical*  
538 *Ecology*, 35(3), 307–319. doi:10.1007/s10886-009-9601-0
- 539 Elzinga, J. A., & Bernasconi, G. (2009). Enhanced frugivory on invasive *Silene latifolia* in its  
540 native range due to increased oviposition. *Journal of Ecology*, 97(5), 1010–1019.  
541 doi:10.1111/j.1365-2745.2009.01534.x

- 542 Enders, L. S., & Nunney, L. (2016). Reduction in the cumulative effect of stress-induced  
543 inbreeding depression due to intragenerational purging in *Drosophila melanogaster*.  
544 *Heredity*, 116(3), 304–313. doi:10.1038/hdy.2015.103
- 545 Estoup, A., Ravigné, V., Hufbauer, R., Vitalis, R., Gautier, M., & Facon, B. (2016). Is There a  
546 Genetic Paradox of Biological Invasion? *Annual Review of Ecology, Evolution, and*  
547 *Systematics*, 47(1), 51–72. doi:10.1146/annurev-ecolsys-121415-032116
- 548 Ferrari, M. J., Stephenson, A. G., Mescher, M. C., & Moraes, C. M. D. (2006). Inbreeding  
549 effects on blossom volatiles in *Cucurbita pepo* subsp. *texana* (Cucurbitaceae).  
550 *American Journal of Botany*, 93(12), 1768–1774. doi:10.3732/ajb.93.12.1768
- 551 Fields, P. D., & Taylor, D. R. (2014). Determinants of genetic structure in a nonequilibrium  
552 metapopulation of the plant *Silene latifolia*. *PLOS ONE*, 9(9), e104575.  
553 doi:10.1371/journal.pone.0104575
- 554 Fox, C. W., & Reed, D. H. (2011). Inbreeding depression increases with environmental  
555 stress: an experimental study and meta-analysis. *Evolution*, 65(1), 246–258.  
556 doi:10.1111/j.1558-5646.2010.01108.x
- 557 Harrison, X. A. (2014). Using observation-level random effects to model overdispersion in  
558 count data in ecology and evolution. *PeerJ*, 2, e616. doi:10.7717/peerj.616
- 559 Harrison, X. A. (2015). A comparison of observation-level random effect and Beta-Binomial  
560 models for modelling overdispersion in binomial data in ecology & evolution. *PeerJ*, 3,  
561 e1114. doi:10.7717/peerj.1114
- 562 Hayes, C. N., Winsor, J. A., & Stephenson, A. G. (2004). Inbreeding influences herbivory in  
563 *Cucurbita pepo* ssp. *texana* (Cucurbitaceae). *Oecologia*, 140(4), 601–608.  
564 doi:10.1007/s00442-004-1623-2
- 565 Hufbauer, R. A., Rutschmann, A., Serrate, B., Vermeil de Conchard, H., & Facon, B. (2013).  
566 Role of propagule pressure in colonization success: disentangling the relative  
567 importance of demographic, genetic and habitat effects. *Journal of Evolutionary*  
568 *Biology*, 26(8), 1691–1699. doi:10.1111/jeb.12167

- 569 Hufbauer, R. A. (2008). Biological invasions: paradox lost and paradise gained. *Current*  
570 *Biology*, 18(6), R246–R247. doi:10.1016/j.cub.2008.01.038
- 571 Kariyat, R. R., Mauck, K. E., De Moraes, C. M., Stephenson, A. G., & Mescher, M. C. (2012).  
572 Inbreeding alters volatile signalling phenotypes and influences tri-trophic interactions  
573 in horsenettle (*Solanum carolinense* L.). *Ecology Letters*, 15(4), 301–309.  
574 doi:10.1111/j.1461-0248.2011.01738.x
- 575 Kariyat, R. R., Mena-Alí, J., Forry, B., Mescher, M. C., Moraes, C. M., & Stephenson, A. G.  
576 (2012). Inbreeding, herbivory, and the transcriptome of *Solanum carolinense*.  
577 *Entomologia Experimentalis et Applicata*, 144(1), 134–144. doi:10.1111/j.1570-  
578 7458.2012.01269.x
- 579 Keane, R. M., & Crawley, M. J. (2002). Exotic plant invasions and the enemy release  
580 hypothesis. *Trends in Ecology & Evolution*, 17(4), 164–170. doi:10.1016/S0169-  
581 5347(02)02499-0
- 582 Keller, S. R., Gilbert, K. J., Fields, P. D., & Taylor, D. R. (2012). Bayesian inference of a  
583 complex invasion history revealed by nuclear and chloroplast genetic diversity in the  
584 colonizing plant *Silene latifolia*. *Molecular Ecology*, 21(19), 4721–4734.  
585 doi:10.1111/j.1365-294X.2012.05751.x
- 586 Keller, S. R., Sowell, D. R., Neiman, M., Wolfe, L. M., & Taylor, D. R. (2009). Adaptation and  
587 colonization history affect the evolution of clines in two introduced species. *New*  
588 *Phytologist*, 183(3), 678–690. doi:10.1111/j.1469-8137.2009.02892.x
- 589 Keller, S. R., & Taylor, D. R. (2008). History, chance and adaptation during biological  
590 invasion: separating stochastic phenotypic evolution from response to selection.  
591 *Ecology Letters*, 11(8), 852–866. doi:10.1111/j.1461-0248.2008.01188.x
- 592 Klopstein, S., Currat, M., & Excoffier, L. (2006). The fate of mutations surfing on the wave of  
593 a range expansion. *Molecular Biology and Evolution*, 23(3), 482–490.  
594 doi:10.1093/molbev/msj057



- 595 Korner-Nievergelt, F., Roth, T., Felten, S., Guelat, J., Almasi, B., & Korner-Nievergelt, P.  
596 (2015). Bayesian data analysis in ecology using linear models with R. *Elsevier*.  
597 Retrieved from <https://www.R-project.org/package=blmeco>
- 598 Kristensen, T. N., Pedersen, K. S., Vermeulen, C. J., & Loeschcke, V. (2010). Research on  
599 inbreeding in the 'omic' era. *Trends in Ecology & Evolution*, *25*(1), 44–52.  
600 doi:10.1016/j.tree.2009.06.014
- 601 Lachmuth, S., Durka, W., & Schurr, F. M. (2011). Differentiation of reproductive and  
602 competitive ability in the invaded range of *Senecio inaequidens*: the role of genetic  
603 Allee effects, adaptive and nonadaptive evolution. *New Phytologist*, *192*(2), 529–541.  
604 doi:10.1111/j.1469-8137.2011.03808.x
- 605 Leimu, R., Kloss, L., & Fischer, M. (2008). Effects of experimental inbreeding on herbivore  
606 resistance and plant fitness: the role of history of inbreeding, herbivory and abiotic  
607 factors. *Ecology Letters*, *11*(10), 1101–1110. doi:10.1111/j.1461-0248.2008.01222.x
- 608 Leimu, R., Vergeer, P., Angeloni, F., & Ouborg, N. J. (2010). Habitat fragmentation, climate  
609 change, and inbreeding in plants. *Annals of the New York Academy of Sciences*,  
610 *1195*(1), 84–98. doi:10.1111/j.1749-6632.2010.05450.x
- 611 Lenth, R. V. (2016). Least-squares means: the R package lsmeans. *Journal of Statistical*  
612 *Software*, *69*(1), 1–33. doi:10.18637/jss.v069.i01
- 613 Maron, J. L., & Crone, E. (2006). Herbivory: effects on plant abundance, distribution and  
614 population growth. *Proceedings of the Royal Society of London B: Biological*  
615 *Sciences*, *273*(1601), 2575–2584. doi:10.1098/rspb.2006.3587
- 616 McCauley, D. E. (1997). The relative contributions of seed and pollen movement to the local  
617 genetic structure of *Silene alba*. *Journal of Heredity*, *88*(4), 257–263. doi:88/4/257.1.x
- 618 McCauley, D. E. (1994). Contrasting the distribution of chloroplast DNA and allozyme  
619 polymorphism among local populations of *Silene alba*: implications for studies of gene  
620 flow in plants. *Proceedings of the National Academy of Sciences*, *91*(17), 8127–8131.

- 621 McCauley, D. E., Raveill, J., & Antonovics, J. (1995). Local founding events as determinants  
622 of genetic structure in a plant metapopulation. *Heredity*, 75(6), 630–636.  
623 doi:doi:10.1038/hdy.1995.182
- 624 Mitchell, C. E., Agrawal, A. A., Bever, J. D., Gilbert, G. S., Hufbauer, R. A., Klironomos, J. N.,  
625 ... Vázquez, D. P. (2006). Biotic interactions and plant invasions. *Ecology Letters*,  
626 9(6), 726–740. doi:10.1111/j.1461-0248.2006.00908.x
- 627 Murren, C. J., & Dudash, M. R. (2012). Variation in inbreeding depression and plasticity  
628 across native and non-native field environments. *Annals of Botany*, 109(3), 621–632.  
629 doi:10.1093/aob/mcr325
- 630 Normand S., Zimmermann N. E., Schurr F. M., & Lischke H. (2014). Demography as the  
631 basis for understanding and predicting range dynamics. *Ecography*, 37(12), 1149–  
632 1154. doi:10.1111/ecog.01490
- 633 Orians, C. M., & Ward, D. (2010). Evolution of plant defenses in nonindigenous  
634 environments. *Annual Review of Entomology*, 55(1), 439–459. doi:10.1146/annurev-  
635 ento-112408-085333
- 636 Orr, H. A. (2009). Fitness and its role in evolutionary genetics. *Nature Reviews Genetics*,  
637 10(8), 531–539. doi:10.1038/nrg2603
- 638 Phillips, B. L., Brown, G. P., & Shine, R. (2010). Life-history evolution in range-shifting  
639 populations. *Ecology*, 91(6), 1617–1627. doi:10.1890/09-0910.1
- 640 R Development Core Team. (2015). R: a language and environment for statistical computing.  
641 *R Foundation for Statistical Computing*. Retrieved from <https://www.R-project.org/>
- 642 Reed, D. H., Briscoe, D. A., & Frankham, R. (2002). Inbreeding and extinction: the effect of  
643 environmental stress and lineage. *Conservation Genetics*, 3(3), 301–307.  
644 doi:10.1023/A:1019948130263
- 645 Reed, D. H., Fox, C. W., Enders, L. S., & Kristensen, T. N. (2012). Inbreeding–stress  
646 interactions: evolutionary and conservation consequences. *Annals of the New York  
647 Academy of Sciences*, 1256(1), 33–48. doi:10.1111/j.1749-6632.2012.06548.x

- 648 Richards, C. M. (2000). Inbreeding depression and genetic rescue in a plant metapopulation.  
649 *The American Naturalist*, 155(3), 383–394. doi:10.1086/303324
- 650 Rius, M., & Darling, J. A. (2014). How important is intraspecific genetic admixture to the  
651 success of colonising populations? *Trends in Ecology & Evolution*, 29(4), 233–242.  
652 doi:10.1016/j.tree.2014.02.003
- 653 Roman, J., & Darling, J. (2007). Paradox lost: genetic diversity and the success of aquatic  
654 invasions. *Trends in Ecology & Evolution*, 22(9), 454–464.  
655 doi:10.1016/j.tree.2007.07.002
- 656 Rosche, C., Hensen, I., & Lachmuth, S. (2017). Local pre-adaptation to disturbance and  
657 inbreeding–environment interactions affect colonisation abilities of diploid and  
658 tetraploid *Centaurea stoebe*. *Plant Biology*. doi:10.1111/plb.12628
- 659 Sandner, T. M., & Matthies, D. (2016). The effects of stress intensity and stress type on  
660 inbreeding depression in *Silene vulgaris*. *Evolution*, 70(6), 1225–1238.  
661 doi:10.1111/evo.12929
- 662 Sandner, T. M., & Matthies, D. (2017). Interactions of inbreeding and stress by poor host  
663 quality in a root hemiparasite. *Annals of Botany*, 119(1), 143–150.  
664 doi:10.1093/aob/mcw190
- 665 Schou, M. F., Loeschcke, V., & Kristensen, T. N. (2015). Inbreeding depression across a  
666 nutritional stress continuum. *Heredity*, 115(1), 56–62. doi:10.1038/hdy.2015.16
- 667 Schrieber, K., Kröner, L., Schweiger, R. & Müller, C. (accepted for publication in Journal of  
668 Ecology): Inbreeding diminishes herbivore-induced metabolic responses in native and  
669 invasive plant populations.
- 670 Schrieber, K., & Lachmuth, S. (2017). The Genetic Paradox of Invasions revisited: the  
671 potential role of inbreeding × environment interactions in invasion success. *Biological*  
672 *Reviews*, 92(2), 939–952. doi:10.1111/brv.12263
- 673 Schrieber, K., Wolf, S., Wypior, C., Höhlig, D., Hensen, I., & Lachmuth, S. (2017). Adaptive  
674 and non-adaptive evolution of trait means and genetic trait correlations for herbivory

- 675 resistance and performance in an invasive plant. *Oikos*, 126(4), 572–582.  
676 doi:10.1111/oik.03781
- 677 Schultz, E. L., Eckberg, J. O., Berg, S. S., Louda, S. M., & Miller, T. E. X. (2017). Native  
678 insect herbivory overwhelms context dependence to limit complex invasion dynamics  
679 of exotic weeds. *Ecology Letters*, 20(11), 1374–1384. doi:10.1111/ele.12833
- 680 Taylor, D. R., & Keller, S. R. (2007). Historical range expansion determines the phylogenetic  
681 diversity introduced during contemporary species invasion. *Evolution*, 61(2), 334–  
682 345. doi:10.1111/j.1558-5646.2007.00037.x
- 683 Travis, J. M. J., Münkemüller, T., Burton, O. J., Best, A., Dytham, C., & Johst, K. (2007).  
684 Deleterious mutations can surf to high densities on the wave front of an expanding  
685 population. *Molecular Biology and Evolution*, 24(10), 2334–2343.  
686 doi:10.1093/molbev/msm167
- 687 Venables, W. N., & Ripley, B. D. (2000). *Modern Applied Statistics with S. Fourth Edition*.  
688 New York, USA: Springer.
- 689 Whitney, K. D., & Gabler, C. A. (2008). Rapid evolution in introduced species, ‘invasive traits’  
690 and recipient communities: challenges for predicting invasive potential. *Diversity and*  
691 *Distributions*, 14(4), 569–580. doi:10.1111/j.1472-4642.2008.00473.x
- 692 Wolfe, L. M. (2002). Why alien invaders succeed: support for the escape-from-enemy  
693 hypothesis. *The American Naturalist*, 160(6), 705–711. doi:10.1086/343872
- 694 Wolfe, L. M., Elzinga, J. A., & Biere, A. (2004). Increased susceptibility to enemies following  
695 introduction in the invasive plant *Silene latifolia*. *Ecology Letters*, 7(9), 813–820.  
696 doi:10.1111/j.1461-0248.2004.00649.x
- 697 Zhang, D.-Y., & Jiang, X.-H. (2006). Interactive effects of habitat productivity and herbivore  
698 pressure on the evolution of anti-herbivore defense in invasive plant populations.  
699 *Journal of Theoretical Biology*, 242(4), 935–940. doi:10.1016/j.jtbi.2006.05.016
- 700 Zuur, R. A. F., Ieno, E. N., Walker, N. J., Saveliev, A. A., & Smith, G. M. (2009). *Mixed Effects*  
701 *Models and Extensions in Ecology*. New York: Springer.

702 **Supporting Information**

703 **Supporting Information 1, Fig. S1**

704 Map of the geographic locations of the sampled native and invasive *Silene latifolia*  
705 populations.

706 **Supporting Information 2, Table S2**

707 Overview of the geographic locations and sizes of the sampled native and invasive *Silene*  
708 *latifolia* populations.

709 **Figures:**

710 **Fig. 1:** Overview of the two generations of experimental breeding within each of the 16 *Silene*  
711 *latifolia* populations. The crossings were performed with five families (numbered circles). In the  
712 P-generation females (orange plants) were fertilized with pollen from males (green plants)  
713 from the same family for inbreeding (dashed arrows), and with pollen from males from a  
714 different family for outbreeding (solid arrows). In the P-generation, inbreeding and outbreeding  
715 were performed at distinct flowers of the same female individual. In the F1-generation,  
716 inbreeding was performed with individuals from inbred families and outbreeding with  
717 individuals from outbred families from the P-generation. Numbers for the F1-generation  
718 families correspond to the maternal/paternal plant of the breedings in the P-generation.

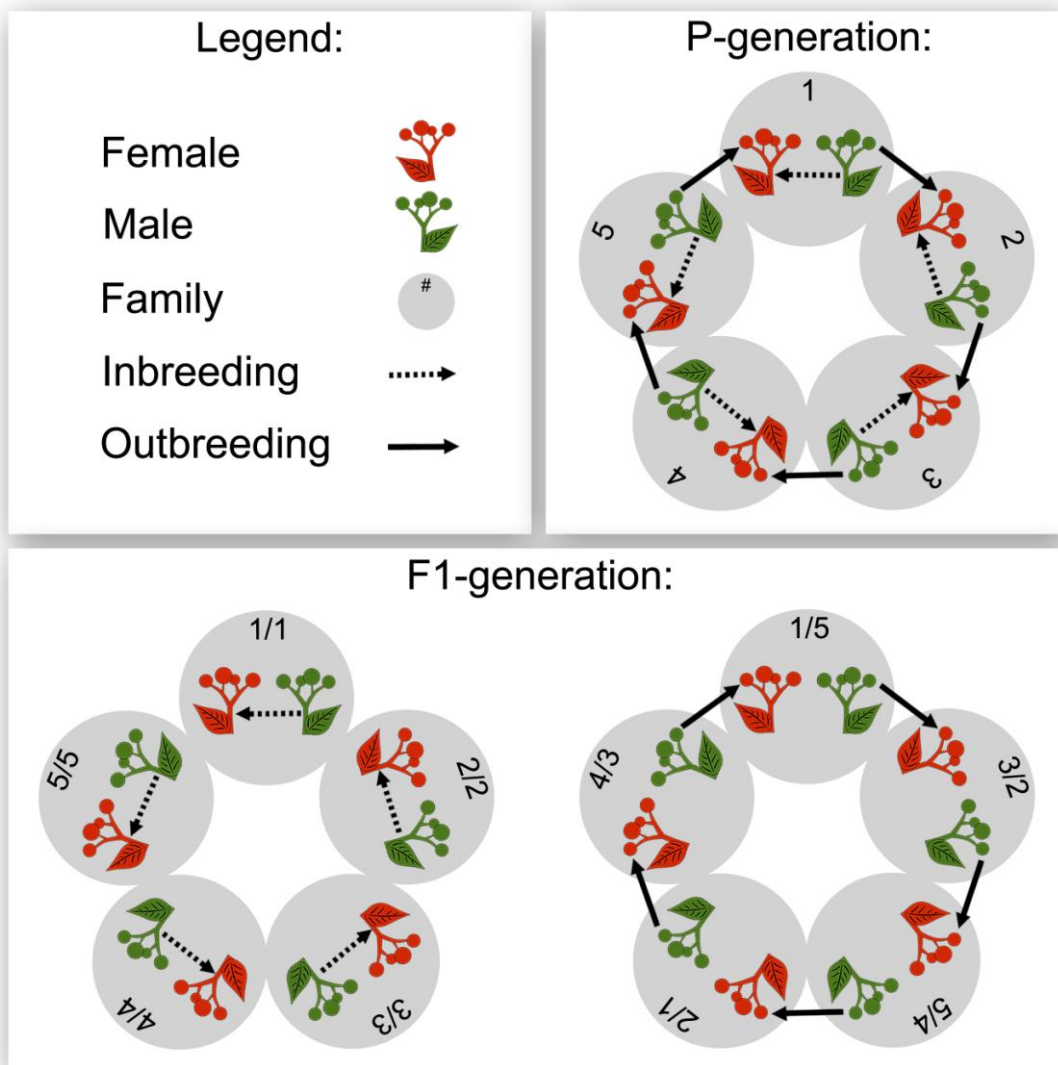

719 **Fig. 2:** Overview of the experimental manipulation of enemy infestation. The figure illustrates  
720 the non-vegetated areas (light gray faces) with the experimental plots (white faces) and the  
721 vegetated areas (structured, dark gray faces) from which natural enemies colonized the  
722 plots. Either the enemy exclusion (bold black frames) or the enemy inclusion (thin black  
723 frames) treatment was applied to each eight uniformly distributed plots. Within each plot,  
724 plants were equally distributed with respect to range (native = black, invasive = gray) and  
725 breeding treatment (filled = outcrossed, open = inbred).

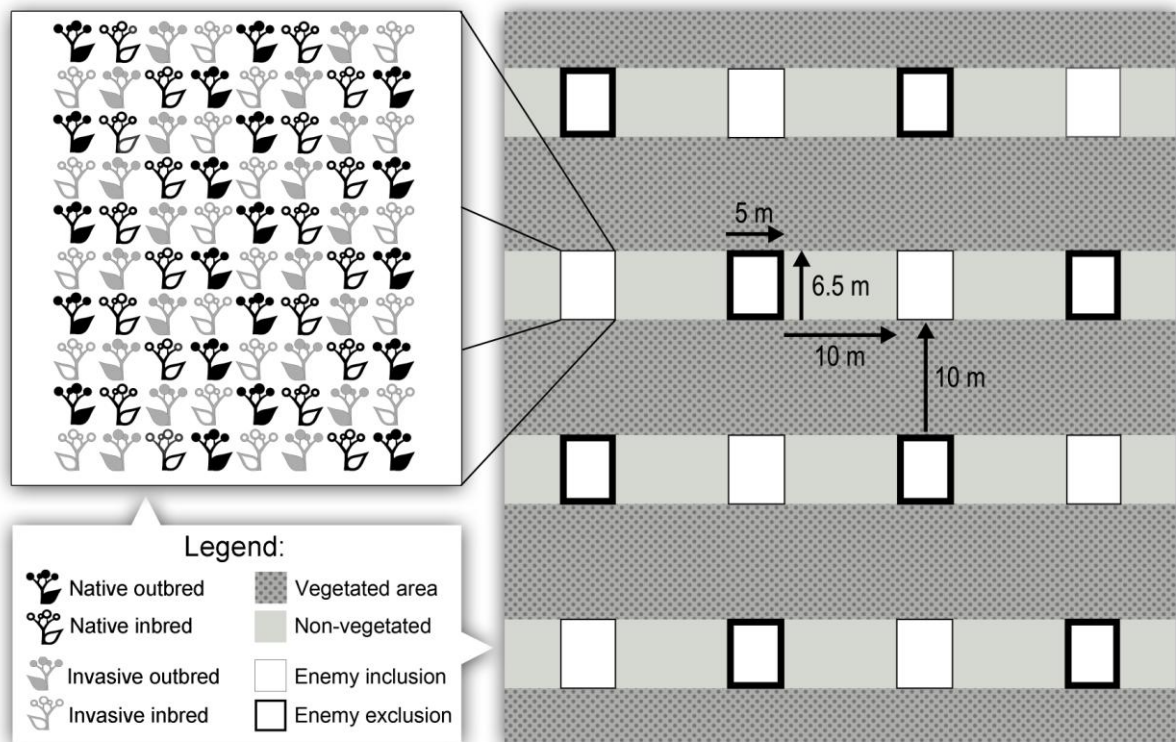

726 **Fig. 3:** Combined effects of range (native [black] *versus* invasive [gray]) and breeding  
727 treatment (outbred [filled] *versus* inbred [open]) on **a)** the density of leaf trichomes, **b)** the  
728 proportion of damaged leaves, **c)** the proportion of damaged flowers and **d)** the proportion of  
729 damaged fruits in *Silene latifolia*, which were acquired in enemy inclusions. The circles and  
730 arrows represent least square means with their standard errors extracted from the full  
731 (G)LMMs. The significance levels for fixed effects terms maintained in the minimal adequate  
732 (G)LMMs (determined with likelihood ratio tests) are denoted at the top of each plot (\*:  $p <$   
733 0.05, \*\*:  $p <$  0.01, \*\*\*:  $p <$  0.001). Connecting lines between means of inbreds and outbreds  
734 mark significant range  $\times$  breeding treatment interactions.

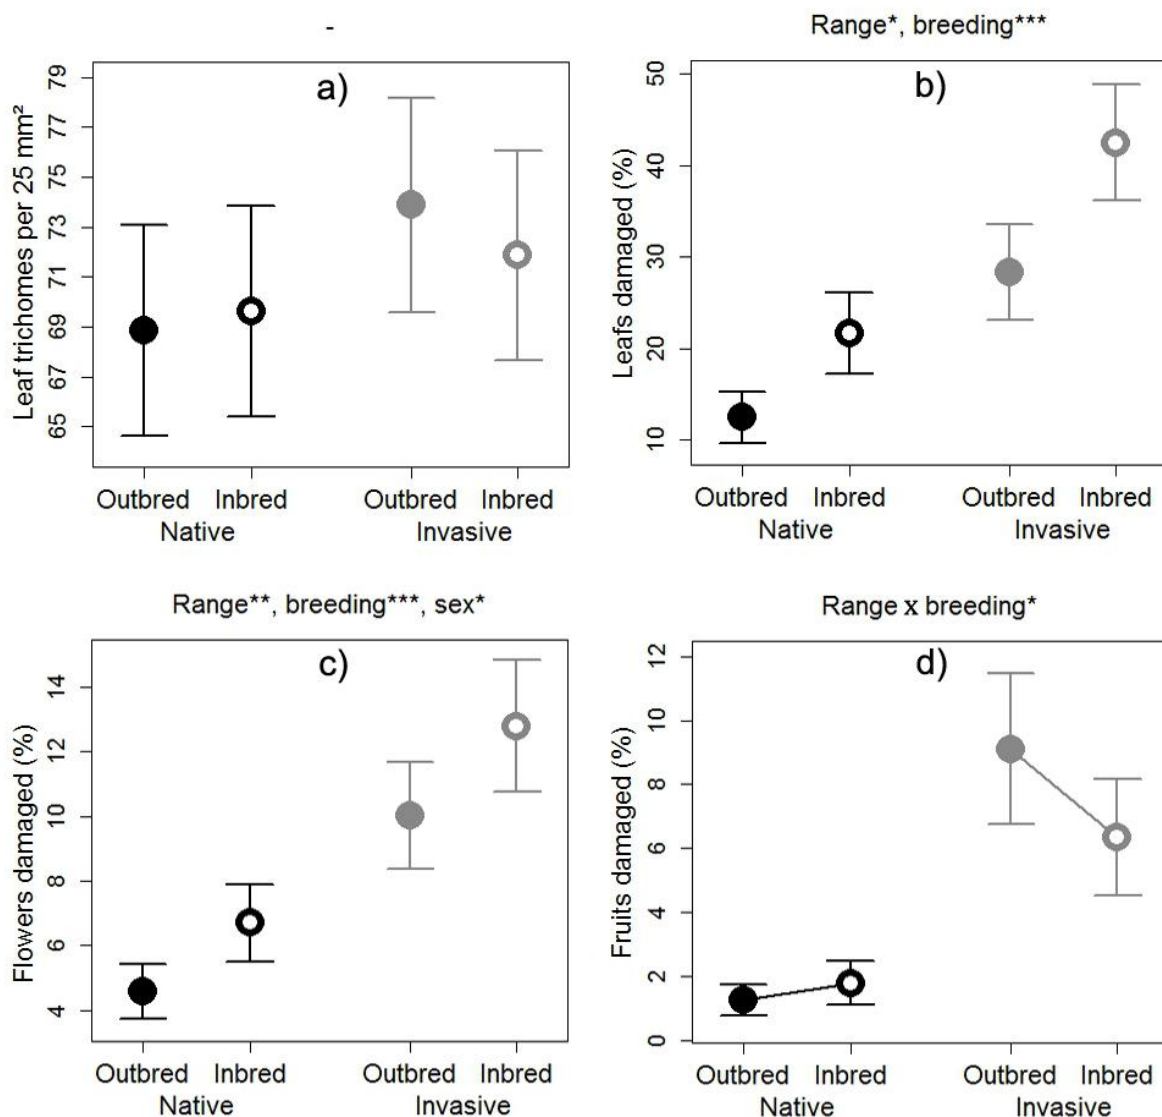



735 **Fig. 4:** Combined effects of range (native [black] *versus* invasive [gray]), breeding treatment  
 736 (outbred [filled] *versus* inbred [open]) and enemy treatment (exclusion [circles] *versus*  
 737 inclusion [squares]) on the **a)** aboveground biomass, **b)** corolla diameter, **c)** number of  
 738 flowers, and **d)** number of fruits of *Silene latifolia*. The circles and arrows represent least  
 739 square means with their standard errors extracted from the full (G)LMMs. The significance  
 740 levels for fixed effects terms maintained in the minimal adequate (G)LMMs (determined with  
 741 likelihood ratio tests) are denoted at the top of each plot (\*:  $p < 0.05$ , \*\*:  $p < 0.01$ , \*\*\*:  $p <$   
 742  $0.001$ ). Connecting lines between means of inbreds and outbreds mark significant two-way  
 743 interactions in which breeding treatment is involved.

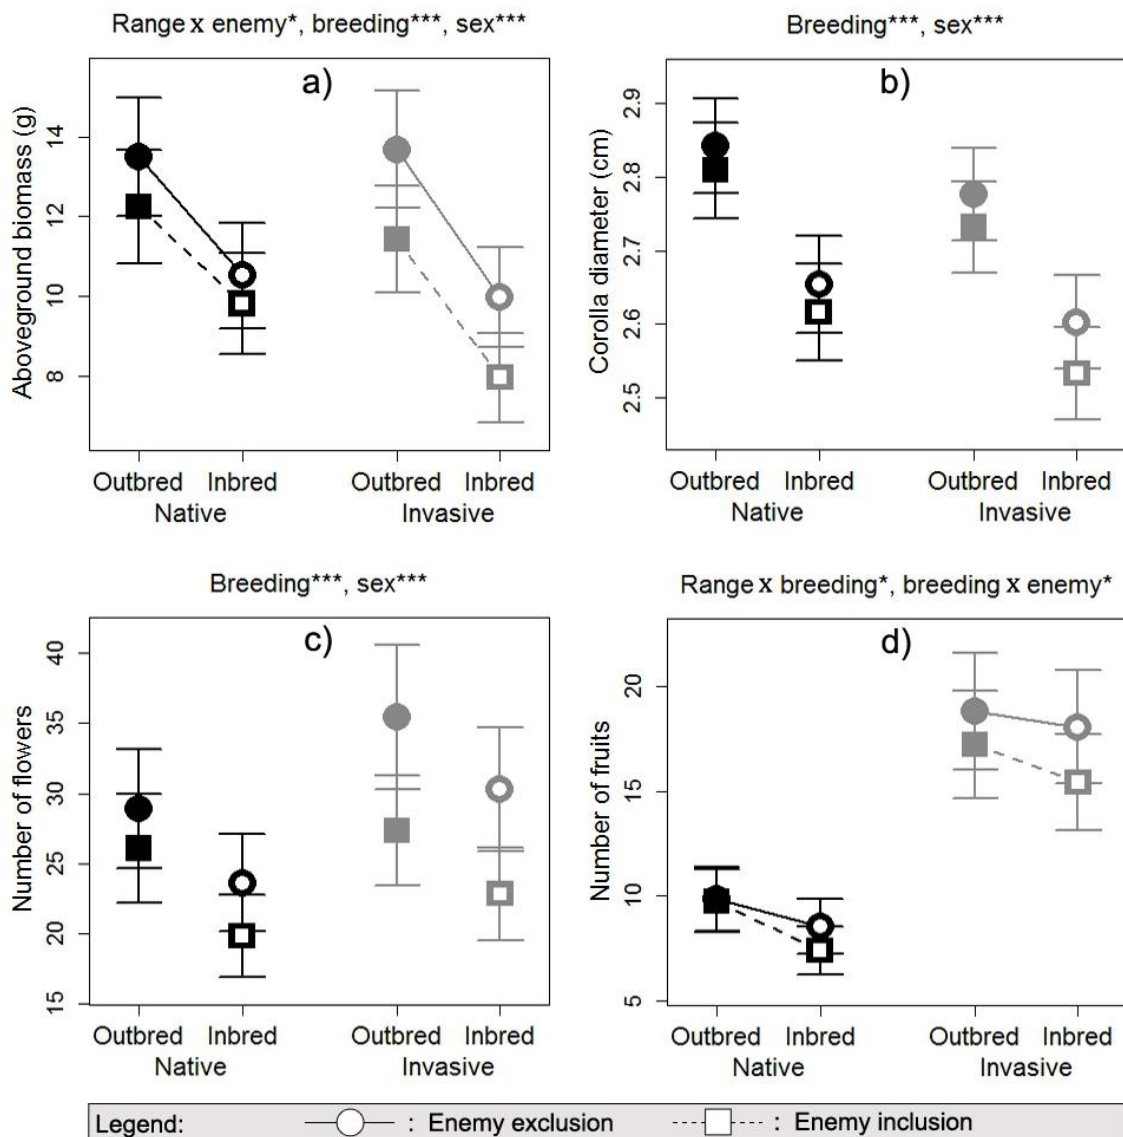

744 **Table 1:** Overview and results of analyses evaluating the interactive effects of range, breeding treatment and enemy treatment as well as the effects of  
 745 covariates (sex, latitudinal origin of population) on the performance of *Silene latifolia*. Responses are presented with their error distribution and the applied model  
 746 type (LMM, linear mixed effects model; GLMM, generalized linear mixed effects model). The table presents  $\chi^2$  and  $p$ -values obtained during stepwise backward  
 747 model selection based on likelihood ratio tests for each fixed effect term as well as the number of groups within random effects and the number of observations  
 748 for each response; ii: fixed effect term in significant interaction, -: fixed or random effect not tested.

| Responses:                        | Leaf trichomes |       | Leaf damage     |                  | Flower damage   |                  | Fruit damage    |              | Biomass        |                  | Corolla diameter |                  | Number flowers |                  | Number fruits  |              |
|-----------------------------------|----------------|-------|-----------------|------------------|-----------------|------------------|-----------------|--------------|----------------|------------------|------------------|------------------|----------------|------------------|----------------|--------------|
|                                   | LMM (Gaussian) |       | GLMM (binomial) |                  | GLMM (binomial) |                  | GLMM (binomial) |              | LMM (Gaussian) |                  | LMM (Gaussian)   |                  | GLMM (Poisson) |                  | GLMM (Poisson) |              |
| Fixed effects:                    | $\chi^2$       | $p$   | $\chi^2$        | $p$              | $\chi^2$        | $p$              | $\chi^2$        | $p$          | $\chi^2$       | $p$              | $\chi^2$         | $p$              | $\chi^2$       | $p$              | $\chi^2$       | $p$          |
| Range                             | 0.345          | 0.557 | <b>5.391</b>    | <b>0.020</b>     | <b>6.795</b>    | <b>0.009</b>     | i.i.            | i.i.         | i.i.           | i.i.             | 1.674            | 0.196            | 1.643          | 0.200            | i.i.           | i.i.         |
| Breeding                          | 0.213          | 0.644 | <b>41.693</b>   | <b>&lt;0.001</b> | <b>40.982</b>   | <b>&lt;0.001</b> | i.i.            | i.i.         | <b>116.629</b> | <b>&lt;0.001</b> | <b>54.468</b>    | <b>&lt;0.001</b> | <b>24.516</b>  | <b>&lt;0.001</b> | i.i.           | i.i.         |
| Enemy                             | -              | -     | -               | -                | -               | -                | -               | -            | i.i.           | i.i.             | 1.752            | 0.186            | 2.914          | 0.088            | i.i.           | i.i.         |
| Range × breeding                  | 0.758          | 0.384 | 0.031           | 0.860            | 1.478           | 0.224            | <b>4.124</b>    | <b>0.042</b> | 3.039          | 0.081            | 0.005            | 0.941            | 0.740          | 0.389            | <b>5.871</b>   | <b>0.015</b> |
| Range × enemy                     | -              | -     | -               | -                | -               | -                | -               | -            | <b>4.772</b>   | <b>0.029</b>     | 0.191            | 0.663            | 2.651          | 0.103            | 0.301          | 1.070        |
| Breeding × enemy                  | -              | -     | -               | -                | -               | -                | -               | -            | 0.058          | 0.810            | 0.091            | 0.763            | 0.340          | 0.557            | <b>4.150</b>   | <b>0.042</b> |
| Range x breeding × enemy          | -              | -     | -               | -                | -               | -                | -               | -            | 0.239          | 0.625            | 0.036            | 0.849            | 0.100          | 0.745            | 0.476          | 0.490        |
| Sex                               | 0.196          | 0.658 | 0.144           | 0.704            | <b>5.225</b>    | <b>0.022</b>     | -               | -            | <b>44.511</b>  | <b>&lt;0.001</b> | <b>41.416</b>    | <b>&lt;0.001</b> | <b>133.510</b> | <b>&lt;0.001</b> | -              | -            |
| Latitudinal origin Population     | 1.034          | 0.309 | 1.993           | 0.158            | 1.332           | 0.248            | 2.862           | 0.091        | 0.007          | 0.933            | 0.002            | 0.969            | 0.000          | 0.962            | 1.304          | 0.253        |
| Random effects:                   | Groups         |       | Groups          |                  | Groups          |                  | Groups          |              | Groups         |                  | Groups           |                  | Groups         |                  | Groups         |              |
| Plot                              | 8              |       | 8               |                  | 8               |                  | 8               |              | 16             |                  | 16               |                  | 16             |                  | 16             |              |
| Population                        | 16             |       | 16              |                  | 16              |                  | 16              |              | 16             |                  | 16               |                  | 16             |                  | 16             |              |
| Population/mother in P-generation | 76             |       | 76              |                  | 76              |                  | 73              |              | 76             |                  | 76               |                  | 76             |                  | 76             |              |
| Population/father in P-generation | 79             |       | 79              |                  | 79              |                  | 75              |              | 79             |                  | 79               |                  | 79             |                  | 79             |              |
| Population/observation            | -              |       | 592             |                  | -               |                  | -               |              | -              |                  | -                |                  | 1192           |                  | -              |              |
| Observations                      | 551            |       | 592             |                  | 571             |                  | 282             |              | 1192           |                  | 1128             |                  | 1192           |                  | 579            |              |

## Supporting Information 1

**Fig. S1:** Map of the geographic locations of the sampled native (left) and invasive (right) *Silene latifolia* populations.

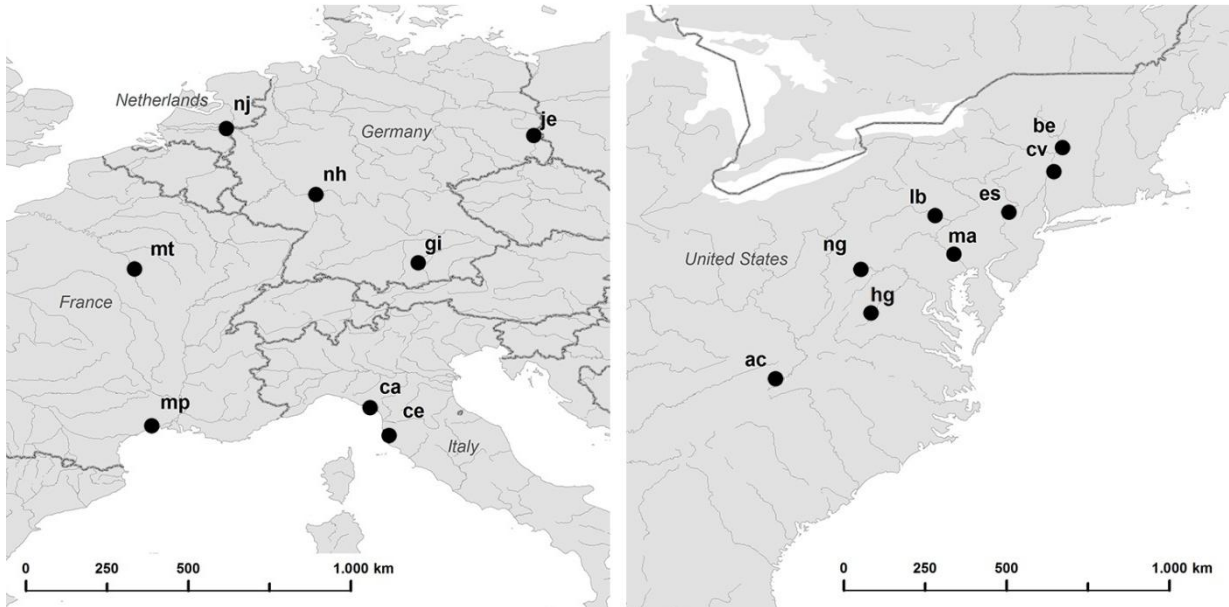

## Supporting Information 2

**Table S2:** Overview of the geographic locations and sizes of the sampled native and invasive *Silene latifolia* populations.

| Range    | City (state)         | ID | °N        | °E         | Population size |
|----------|----------------------|----|-----------|------------|-----------------|
| Native   | Caresana (IT)        | ca | 44.07702  | 9.96384    | 262             |
| Native   | Cecina (IT)          | ce | 43.313769 | 10.51195   | 149             |
| Native   | Gilching (GE)        | gi | 48.105634 | 11.253771  | 35              |
| Native   | Jethe (GE)           | je | 51.6899   | 14.59683   | 485             |
| Native   | Montpellier (FR)     | mp | 43.653567 | 3.893247   | 341             |
| Native   | Monteneau (FR)       | mt | 47.848117 | 3.552508   | 19              |
| Native   | Nackenheim (GE)      | nh | 49.925119 | 8.342758   | 132             |
| Native   | Nijmegen (GE)        | nj | 51.883074 | 5.85185    | 46              |
| Invasive | Crumpler (NC)        | ac | 36.52576  | -81.41558  | 60              |
| Invasive | Bennington (VT)      | be | 42.894717 | -73.294919 | 31              |
| Invasive | Hillsdale (NY)       | cv | 42.234825 | -73.506433 | 350             |
| Invasive | Bushkill (PA)        | es | 41.14009  | -74.9294   | 900             |
| Invasive | Harrisonburg (VA)    | hg | 38.49079  | -78.97762  | 70              |
| Invasive | Lewisburg (PA)       | lb | 40.98179  | -76.93041  | 184             |
| Invasive | Washington Boro (PA) | ma | 39.99635  | -76.47243  | 1100            |
| Invasive | Grantsville (MD)     | ng | 39.637308 | -79.099481 | 1000            |
